# Supplementary material
Source: PubMed Central journal article supplement (PMC5859574)
Supplement: NIHMS943811-supplement-1.pdf [file NIHMS943811-supplement-1.pdf]

| <b>A</b>                   |               |                            | <b>B</b>               |                |                |
|----------------------------|---------------|----------------------------|------------------------|----------------|----------------|
| <b>shEnrich Method</b>     |               |                            | <b>Two best shRNAs</b> |                |                |
| <b>Forward shEnrich</b>    |               |                            | <b>Gene</b>            | <b>shRNA_1</b> | <b>shRNA_2</b> |
| <b>shRNA family size 2</b> | DDR2          | PPP5C                      | PRKCA                  | 3.172          | 1.430          |
| PPP2R1A                    | DKFZP568K0524 | PRG-3                      | TRPV5                  | 2.042          | 1.530          |
| PTBP1                      | DUSP13        | PRKWINK3                   | PPP1R14D               | 2.455          | 2.220          |
| RICK2                      | EAT2          | PTPRM                      | MAST2                  | 2.584          | 2.621          |
| <b>shRNA family size 3</b> | EEF2K         | RAF1                       | PPEF1                  | 2.676          | 1.606          |
| CDC25A                     | EIF2AK3       | RIMS4                      |                        |                |                |
| PTPN18                     | EPM2A         | SGPP2                      |                        |                |                |
| TP53RK                     | FBP2          | SH2D1A                     |                        |                |                |
| <b>shRNA family size 4</b> | FLJ25449      | SMG1                       |                        |                |                |
| BLK                        | Gpr109b       | SNRK                       |                        |                |                |
| CKM                        | GUCY2C        | SPAP1                      |                        |                |                |
| DUSP5                      | IMPA2         | SYT14L                     |                        |                |                |
| EGLN1                      | INPP5F        | WWP2                       |                        |                |                |
| FLJ16518                   | IRAK1         | <b>shRNA family size 8</b> |                        |                |                |
| GALK2                      | ITPKA         | CIB2                       |                        |                |                |
| GMFB                       | LOC283871     | ERBB4                      |                        |                |                |
| HYPB                       | LOC401313     |                            |                        |                |                |
| INPP5B                     | LPPR4         |                            |                        |                |                |
| KIAA2002                   | MAP3K11       | <b>Reverse shEnrich</b>    |                        |                |                |
| LOC400687                  | MAP3K7P1      | <b>shRNA family size 2</b> |                        |                |                |
| LOC441888                  | MAPK4         | CALM1                      |                        |                |                |
| LOC90353                   | NR1I3         | PPP2R1A                    |                        |                |                |
| LOC91461                   | NTSE          | DUSP9                      |                        |                |                |
| NEK7                       | NUDT11        | <b>shRNA family size 3</b> |                        |                |                |
| NUDT10                     | OBSCN         | PPAP2A                     |                        |                |                |
| PHKA2                      | PCTK3         | SSH3                       |                        |                |                |
| PIN1                       | PIB5PA        | <b>shRNA family size 4</b> |                        |                |                |
| PMVK                       | PIP5K1A       | GPR109A                    |                        |                |                |
| PTPN22                     | PLCB4         | LCK                        |                        |                |                |
| PTPN5                      | PPAOC1        | PPP1R14D                   |                        |                |                |
| PTPRE                      | PPAOC1A       | SIK2                       |                        |                |                |
| RIPK5                      | PPEF1         | TRPV5                      |                        |                |                |
| RXRB                       | PPEF2         | <b>shRNA family size 5</b> |                        |                |                |
| SACM1L                     | PPF1A1        | CDC14A                     |                        |                |                |
| TEX14                      | PPM1J         | ENPP1                      |                        |                |                |
| TRPM7                      | PPP1R12B      | EPB41L4A                   |                        |                |                |
| <b>shRNA family size 5</b> | PPP2CB        | NME5                       |                        |                |                |
| ABL1                       | PPP3CA        | PIM1                       |                        |                |                |
| AKAP11                     | PPP4R1        | PKIB                       |                        |                |                |
| CKS2                       | PPP4R1L       | PRKCA                      |                        |                |                |

  

| <b>C</b>               |               |  |
|------------------------|---------------|--|
| <b>Median Approach</b> |               |  |
| <b>gene</b>            | <b>median</b> |  |
| MAST2                  | 1.790         |  |
| PKIB                   | 1.472         |  |
| DUSP8                  | 1.292         |  |
| SSH1                   | -1.275        |  |
| FASTK                  | 1.225         |  |
| PTPRE                  | -1.219        |  |
| PTP4A1                 | 1.178         |  |
| GUCY2C                 | -1.121        |  |
| INPP5A                 | -1.101        |  |
| PPAP2A                 | 1.050         |  |
| SSH3                   | 1.068         |  |
| GMFG                   | 1.059         |  |
| CDC14A                 | 1.052         |  |
| DUSP9                  | 1.050         |  |
| IRAK4                  | 1.048         |  |
| SGKL                   | -1.042        |  |
| STK33                  | 1.042         |  |
| ERBB3                  | 1.035         |  |
| INPP5D                 | 1.030         |  |
| PPP4R1                 | -1.029        |  |
| CHP                    | -1.024        |  |
| TP53RK                 | -1.008        |  |

**Supplemental Table 1. Comparison of gene hits selected by different scoring methods. (A)** Genes selected by shEnrich method. **(B)** Gene hits selected by scoring the top2-shRNAs. **(C)** Genes scored by taking the median of redundant shRNAs.

| Comparison                                                                                                   | Dataset Accession Number |
|--------------------------------------------------------------------------------------------------------------|--------------------------|
| 'cancerous' vs 'normal'                                                                                      | E-TABM-15                |
| 'glioblastoma' vs 'normal'                                                                                   | E-MEXP-567               |
| 'hepatocellular carcinoma' vs 'normal'                                                                       | E-GEOD-36076             |
| 'breast carcinoma' vs 'normal'                                                                               | E-GEOD-10780             |
| 'multiple myeloma' vs 'normal' in 'plasma cells'                                                             | E-GEOD-6691              |
| 'malignant mesothelioma; wild type' vs 'normal; wild type'                                                   | E-GEOD-21750             |
| 'oligodendroglioma' vs 'normal'                                                                              | E-GEOD-21354             |
| 'cancer tissue' vs 'surrounding noncancerous tissue' in 'hepatitis B virus induced hepatocellular carcinoma' | E-GEOD-19665             |
| 'primary node-negative infiltrating ductal breast carcinoma' vs 'normal lymph node'                          | E-GEOD-44408             |
| 'breast cancer' vs 'normal'                                                                                  | E-GEOD-54002             |
| 'glioblastoma multiforme' vs 'normal'                                                                        | E-MTAB-3073              |
| 'astrocytoma' vs 'normal'                                                                                    | E-MTAB-3073              |
| 'pituitary cancer' vs 'normal'                                                                               | E-GEOD-26966             |
| 'cancer tissue' vs 'surrounding noncancerous tissue' in 'hepatitis C virus induced hepatocellular carcinoma' | E-GEOD-19665             |
| 'metastatic prostate cancer' vs 'benign prostate tumor'                                                      | E-GEOD-3325              |
| 'colon cancer' vs 'normal' in 'colon; Fresh-frozen tissue'                                                   | E-GEOD-19249             |
| 'pancreatic cancer' vs 'normal'                                                                              | E-GEOD-49515             |
| 'pancreatic carcinoma' vs 'normal'                                                                           | E-GEOD-36076             |
| 'colon cancer' vs 'normal' in 'colon; Formalin-fixed paraffin-embedded tissue'                               | E-GEOD-19249             |
| 'tumor' vs 'paratumoral tissue'                                                                              | E-GEOD-55048             |
| 'lung adenocarcinoma' vs 'normal' in 'adult'                                                                 | E-GEOD-43767             |
| 'glioblastoma' vs 'normal'                                                                                   | E-GEOD-50161             |
| 'liver tumor' vs 'adjacent non-tumor tissue'                                                                 | E-GEOD-33294             |
| 'hepatocellular carcinoma' vs 'normal'                                                                       | E-GEOD-49515             |
| 'breast cancer' vs 'normal'                                                                                  | E-GEOD-31138             |
| 'breast carcinoma' vs 'normal'                                                                               | E-MTAB-779               |
| 'ovarian cancer' vs 'normal' in 'stromal cell'                                                               | E-GEOD-40595             |
| 'astrocytic glioma' vs 'normal'                                                                              | E-GEOD-21354             |
| 'oligodendroglioma' vs 'normal'                                                                              | E-MTAB-3073              |
| 'osteosarcoma' vs 'normal'                                                                                   | E-MEXP-3628              |
| 'metastatic colorectal cancer to the liver' vs 'normal'                                                      | E-GEOD-50760             |
| 'breast cancer; breast' vs 'normal; breast'                                                                  | E-GEOD-38959             |
| 'lung cancer' vs 'healthy'                                                                                   | E-GEOD-32175             |
| 'invasive ductal carcinoma' vs 'normal'                                                                      | E-GEOD-21422             |
| 'inflammatory breast cancer' vs 'normal'                                                                     | E-GEOD-45581             |
| 'lung cancer' vs 'normal' in 'lung; Fresh-frozen tissue'                                                     | E-GEOD-19249             |
| 'ovarian cancer' vs 'normal' in 'epithelial cell'                                                            | E-GEOD-40595             |
| 'glioblastoma' vs 'control'                                                                                  | E-GEOD-22866             |
| 'metastasis; tumor' vs 'metastasis; normal adjacent tissue'                                                  | E-GEOD-18105             |
| 'glioblastoma' vs 'normal'                                                                                   | E-GEOD-35493             |
| 'astrocytoma' vs 'normal'                                                                                    | E-MEXP-567               |

**Supplemental Table 2. Data accession numbers for Expression Atlas studies.** The table contains accession numbers for each comparison plotted in **Figure 6F** and **Supplemental Fig 10**.
